# Supplementary material
Source: PubMed Central journal article supplement (PMC3624060)
Supplement: NIHMS435337-supplement-213_2012_2948_MOESM2_ESM.pdf [file NIHMS435337-supplement-213_2012_2948_MOESM2_ESM.pdf]

Supplemental Table 1: Correlations among MCCB domain scores after placebo (n=60)

|      | SP   | A/V  | WM   | VerL | VisL | R/PS |
|------|------|------|------|------|------|------|
| A/V  | 0.40 |      |      |      |      |      |
| WM   | 0.64 | 0.36 |      |      |      |      |
| VerL | 0.48 | 0.54 | 0.42 |      |      |      |
| VisL | 0.61 | 0.45 | 0.45 | 0.57 |      |      |
| R/PS | 0.57 | 0.20 | 0.53 | 0.34 | 0.33 |      |
| SC   | 0.12 | 0.02 | 0.08 | 0.13 | 0.30 | 0.21 |
