# Supplementary material
Source: PubMed Central journal article supplement (PMC3624060)
Supplement: NIHMS435337-supplement-213_2012_2948_MOESM3_ESM.pdf [file NIHMS435337-supplement-213_2012_2948_MOESM3_ESM.pdf]

Supplemental Table 2: Cohen's effect sizes for AMPH effects and practice effects on MCCB performance domains, grouped by low vs high baseline performance (n=60)

|      | AMPH Effects (d')         |                            | Practice Effects (d')     |                            |
|------|---------------------------|----------------------------|---------------------------|----------------------------|
|      | Low Baseline <sup>1</sup> | High Baseline <sup>2</sup> | Low Baseline <sup>1</sup> | High Baseline <sup>1</sup> |
| SP   | 0.44                      | 0.54                       | 0.76                      | 0.33                       |
| A/V  | 0.44                      | 0.34                       | 0.70                      | 0.06                       |
| WM   | 0.25                      | 0.99                       | 0.57                      | 0.09                       |
| VerL | 0.52                      | 0.88                       | 1.22                      | 0.72                       |
| VisL | 0.13                      | 0.48                       | 0.55                      | 0.54                       |
| R/PS | 0.39                      | 1.80                       | 0.43                      | 0.12                       |
| SC   | 0.37                      | 0.81                       | 0.60                      | 0.27                       |

1. d' for increased performance
2. d' for decreased performance
