# Supplementary material
Source: PubMed Central journal article supplement (PMC3624060)
Supplement: NIHMS435337-supplement-213_2012_2948_MOESM4_ESM.pdf [file NIHMS435337-supplement-213_2012_2948_MOESM4_ESM.pdf]

Supplemental Table 3: Correlations among MCCB difference scores after amphetamine (n=60)

|      | SP   | A/V   | WM   | VerL | VisL | R/PS |
|------|------|-------|------|------|------|------|
| A/V  | 0.25 |       |      |      |      |      |
| WM   | 0.46 | 0.24  |      |      |      |      |
| VerL | 0.18 | 0.34  | 0.22 |      |      |      |
| VisL | 0.41 | 0.08  | 0.31 | 0.30 |      |      |
| R/PS | 0.14 | 0.00  | 0.07 | 0.19 | 0.06 |      |
| SC   | 0.04 | -0.10 | 0.09 | 0.19 | 0.07 | 0.06 |
