# Supplementary material
Source: PubMed Central journal article supplement (PMC3624060)
Supplement: NIHMS435337-supplement-213_2012_2948_MOESM5_ESM.pdf [file NIHMS435337-supplement-213_2012_2948_MOESM5_ESM.pdf]

Supplemental Table 4: Correlation (R) of personality scale score and AMPH effect on MCCB domains as a function of baseline MCCB performance

| AMPH effect on: | NS           |               | DIS          |               | EPQ          |               |
|-----------------|--------------|---------------|--------------|---------------|--------------|---------------|
|                 | Low Baseline | High Baseline | Low Baseline | High Baseline | Low Baseline | High Baseline |
| SP              | 0.314        | 0.284         | 0.383*       | 0.226         | -0.479**     | 0.091         |
| A/V             | 0.114        | 0.331         | -0.304       | 0.156         | -0.201       | -0.190        |
| WM              | 0.166        | 0.152         | 0.061        | 0.318         | -0.558***    | -0.209        |
| VerL            | -0.040       | 0.351*        | 0.153        | -0.205        | -0.217       | -0.307        |
| VisL            | 0.214        | -0.054        | 0.003        | 0.300         | -0.414*      | -0.360        |
| R/PS            | -0.060       | 0.295         | -0.204       | -0.097        | 0.133        | -0.548***     |
| SC              | 0.000        | 0.175         | 0.017        | 0.179         | 0.022        | -0.185        |

\* p < 0.05; \*\* p < 0.01; \*\*\* p < 0.005
