# Supplementary material
Source: PubMed Central journal article supplement (PMC3624060)

Supplemental Fig. 1.

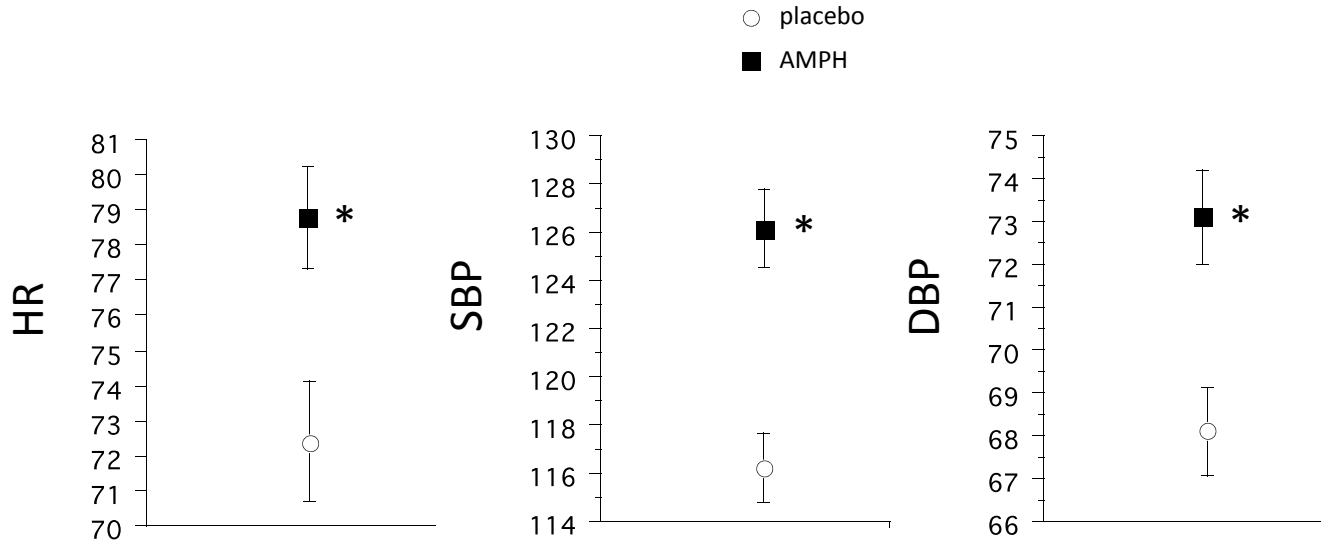

Supplement: NIHMS435337-supplement-213_2012_2948_MOESM1_ESM.pdf [file NIHMS435337-supplement-213_2012_2948_MOESM1_ESM.pdf]
